# Supplementary material for: Recruited mast cells in the tumor microenvironment enhance bladder cancer metastasis via modulation of ERβ/CCL2/CCR2 EMT/MMP9 signals
Source: PubMed Central journal article supplement (PMC4884958; doi:10.18632/oncotarget.5467), 2015-11-05
Supplement: oncotarget-07-7842-s001.pdf [file oncotarget-07-7842-s001.pdf]

**SUPPLEMENTARY TABLE****Supplementary Table S1: Primers for qPCR**

| Target genes | Sense                   | Antisense                |
|--------------|-------------------------|--------------------------|
| ER $\beta$   | AGCACGGCTCCATATACATACC  | TGGACCACTAAAGGAGAAAGGT   |
| CCL2         | CAGCCAGATGCAATCAATGCC   | TGGAATCCTGAACCCACTTCT    |
| CK18         | GGCATCCAGAACGAGAAGGAG   | ATTGTCCACAGTATTTGCGAAGA  |
| E-cadherin   | CGAGAGCTACACGTTACCGG    | GGGTGTCGAGGGAAAAATAGG    |
| N-cadherin   | TTTGATGGAGGTCTCCTAACACC | ACGTTTAAACACGTTGGAAATGTG |
| Snail        | ACTGCGACAAGGAGTACACC    | GAGTGCGTTTGCAGATGGG      |
| Twist        | GCCTAGAGTTGCCGACTTATG   | TGCGTTTCCTGTTAAGGTAGC    |
| Vimentin     | GACGCCATCAACACCGAGTT    | CTTTGTCGTTGGTTAGCTGGT    |
| MMP9         | TGTACCGCTATGGTTACTCTCG  | GGCAGGGACAGTTGCTTCT      |
| GAPDH        | TGTGGGCATCAATGGATTTGG   | ACACCATGTATTCCGGGTCAAT   |
